# Supplementary material for: Astroviruses in bats, Madagascar
Source: PubMed Central journal article supplement (PMC5520320; doi:10.1038/emi.2017.47), 2017-06-21
Supplement: emi201747x1.pdf [file emi201747x1.pdf]

**Supplementary Table 1.** Location, collection date, species and number of bats sampled and tested for the presence of Astroviruses on Madagascar.

| <b>Location</b> | <b>Date</b>                    | <b>Family</b>    | <b>Species</b>                    | <b>N tested</b> | <b>N positive</b> |
|-----------------|--------------------------------|------------------|-----------------------------------|-----------------|-------------------|
| Ambohitantely   | Oct. 2014                      | Molossidae       | <i>Mormopterus jugularis</i>      | 40              | 0                 |
|                 |                                | Vespertilionidae | <i>Myotis goudoti</i>             | 11              | 1                 |
| Anjohibe        | Nov. 2014                      | Rhinonycteridae  | <i>Paratriaenops furculus</i>     | 31              | 11                |
|                 |                                |                  | <i>Triaenops menamena</i>         | 13              | 8                 |
|                 |                                | Miniopteridae    | <i>Miniopterus gleni</i>          | 2               | 1                 |
|                 |                                |                  | <i>Miniopterus griveaudi</i>      | 26              | 15                |
|                 |                                | Molossidae       | <i>Otomops madagascariensis</i>   | 6               | 0                 |
|                 |                                | Pteropodidae     | <i>Rousettus madagascariensis</i> | 41              | 2                 |
|                 |                                | Vespertilionidae | <i>Myotis goudoti</i>             | 3               | 2                 |
|                 | <i>Pipistrellus hesperidus</i> | 5                | 0                                 |                 |                   |
